# Supplementary material
Source: publisher site journal article supplement (https://www.dovepress.com/article/447035)
Supplement: Supplementary file 1 [file get_supplementary_file.php]

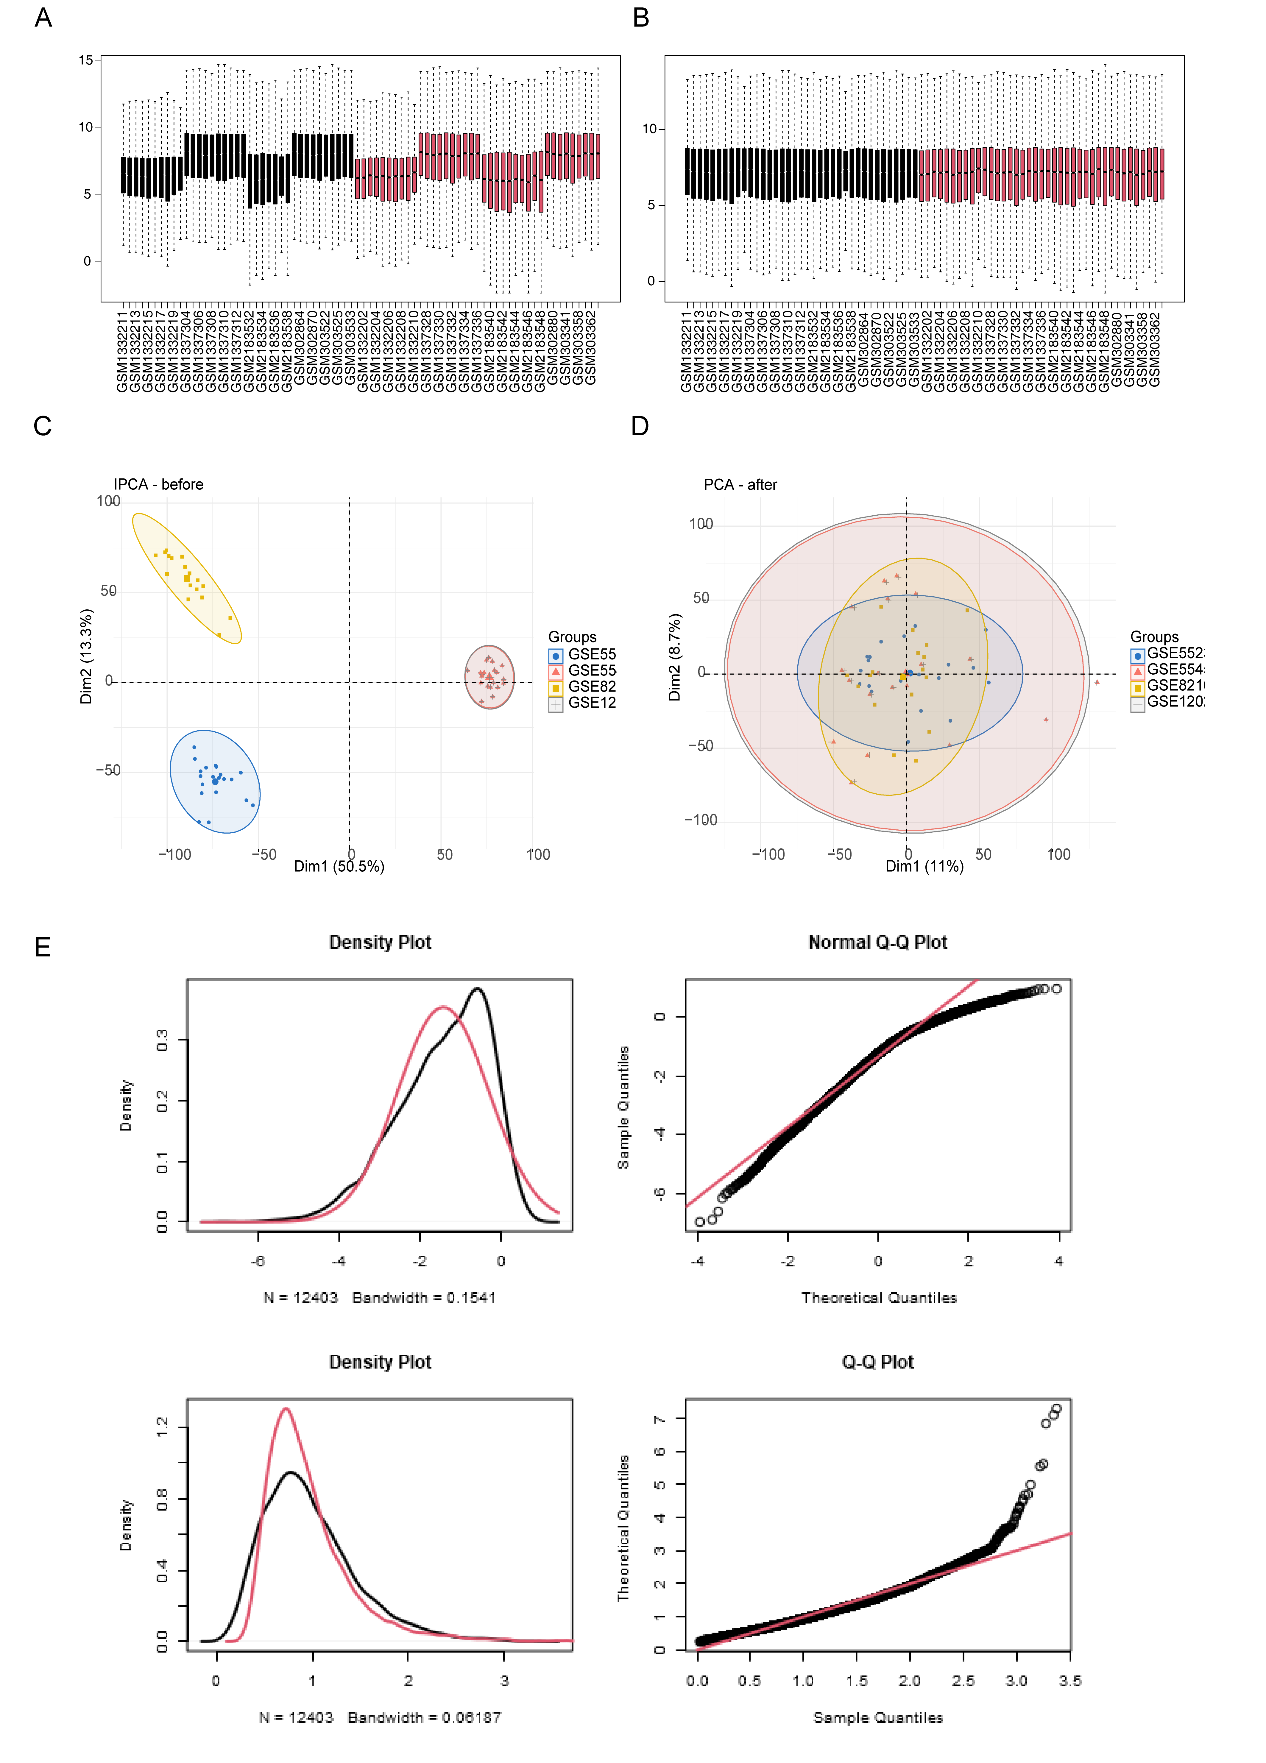


Supplementary Figure 1 Merging and de-batching effects for the GSE55235, GSE55457, GSE82107 and GSE12021 datasets. (A,B) The expression of genes in each sample before (A) and after (B) removal of the batch effect. (C,D) The Principal Components Analysis (PCA) results for osteoarthritis (OA) and control samples before (C) and after (D) de-batching effect. (E) The density plots and QQ plots before and after elimination of the batch effect for the merged dataset.


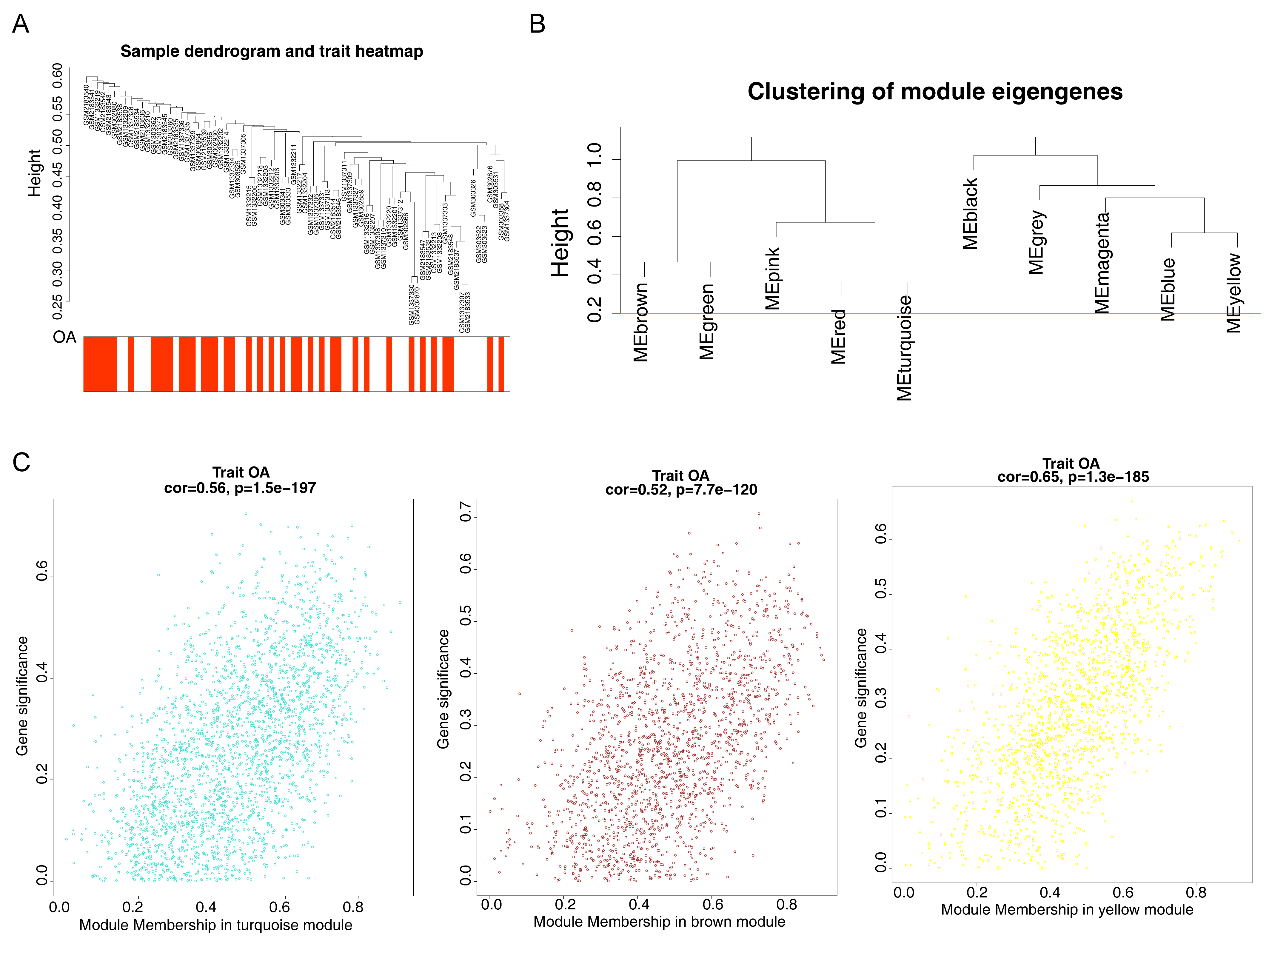


Supplementary Figure 2 Identification of OA-related genes by Weighted Gene Co-expression Network Analysis (WGCNA). (A) The dendrogram and trait heatmap of samples in the combined dataset. (B) The clustering map of module eigengenes. (C) Scatterplot of correlation between key modules (turquoise, brown, and yellow) and OA trait.


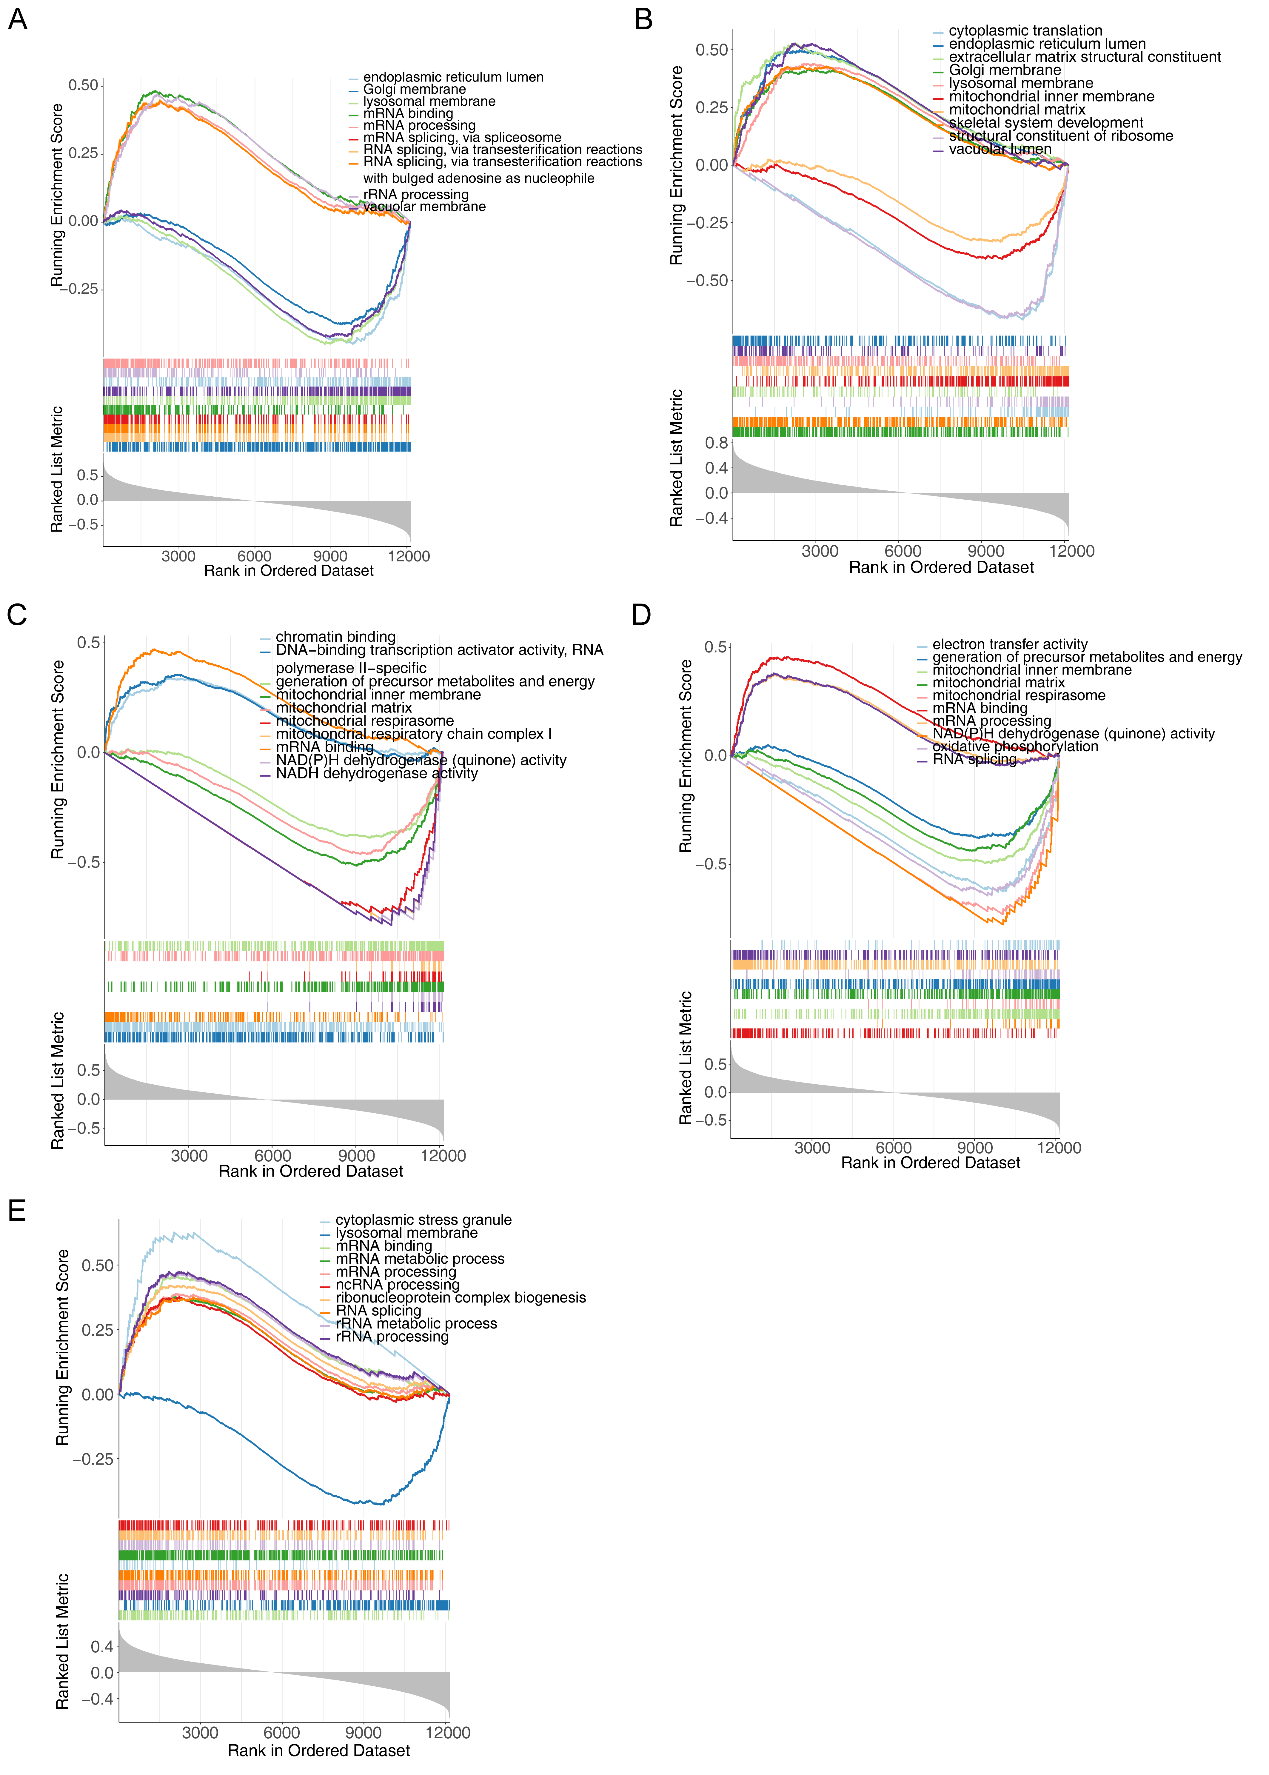


Supplementary Figure 3 Gene Set Enrichment Analysis (GSEA) of cellular senescence-associated biomarkers in OA. A: BCL6; B: EPHA3; C: MCL1; D: PIM1; E: SLC16A7.


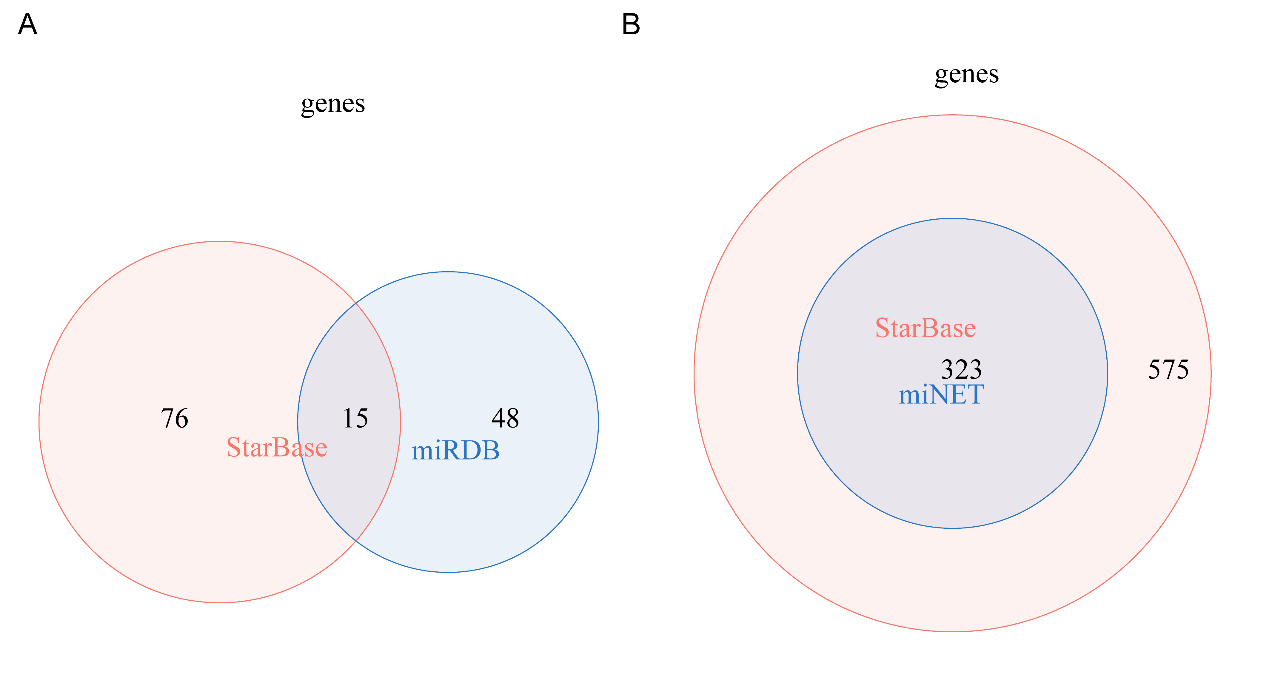


Supplementary Figure 4 Prediction of microRNAs (miRNAs) and long non-coding RNAs (lncRNAs) targeting biomarkers. (A) The Venn diagram of 15 shared miRNAs targeting five biomarkers. (B) The Venn diagram of 323 shared lncRNAs targeting 15 miRNAs.


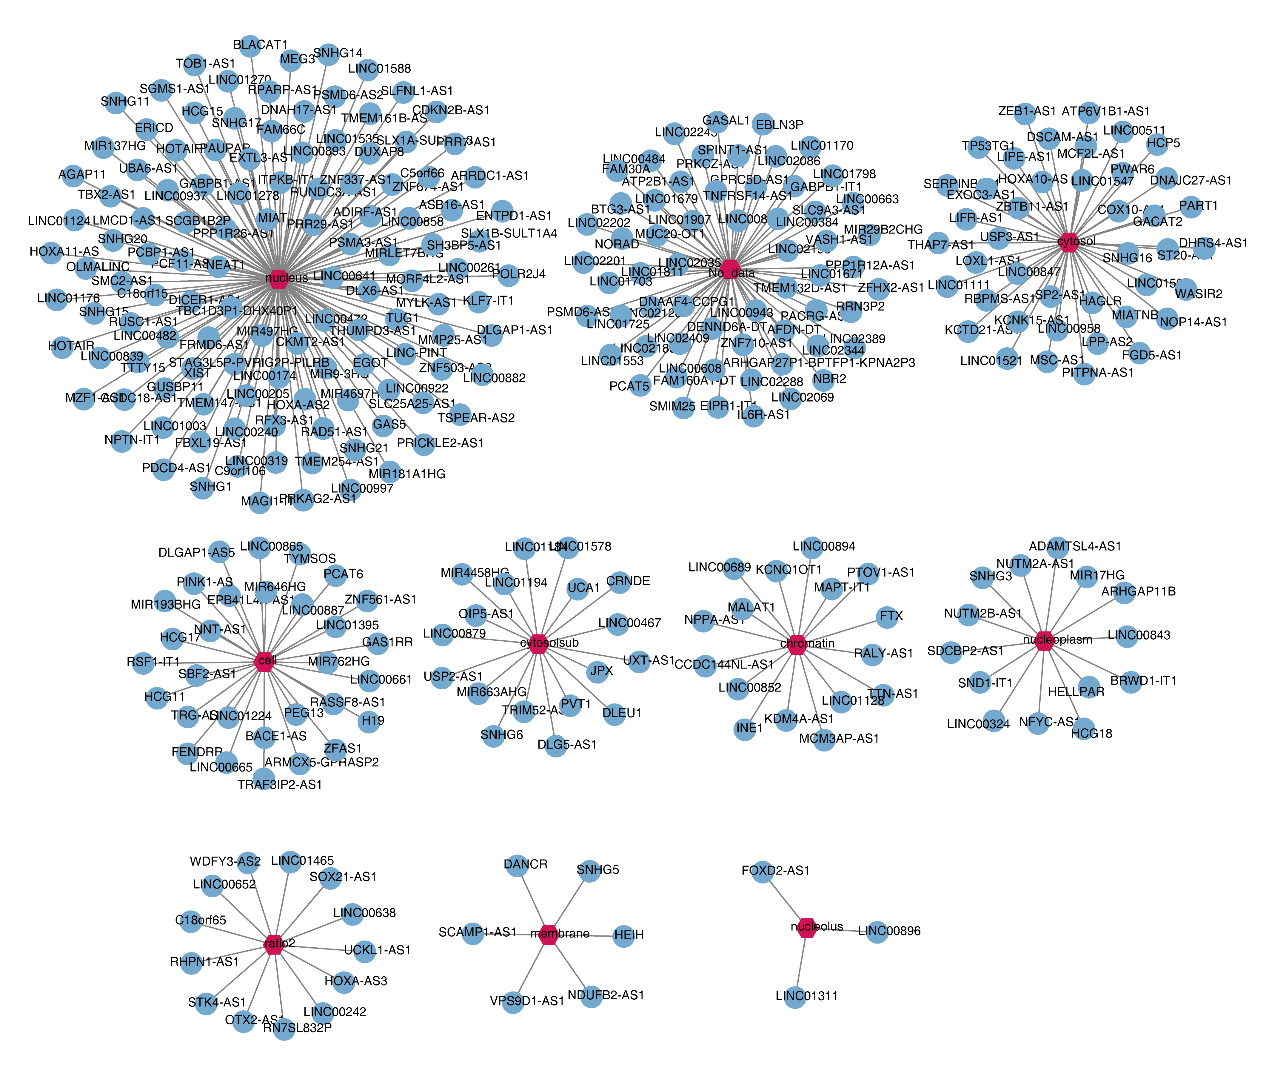


Supplementary Figure 5 The subcellular localization results of lncRNAs. Blue circles indicate lncRNAs and red rectangles indicate specific locations of subcellular localization.
